# Supplementary material
Source: MDPI journal article supplement (https://www.mdpi.com/2079-9292/10/4/377)

True positive rate

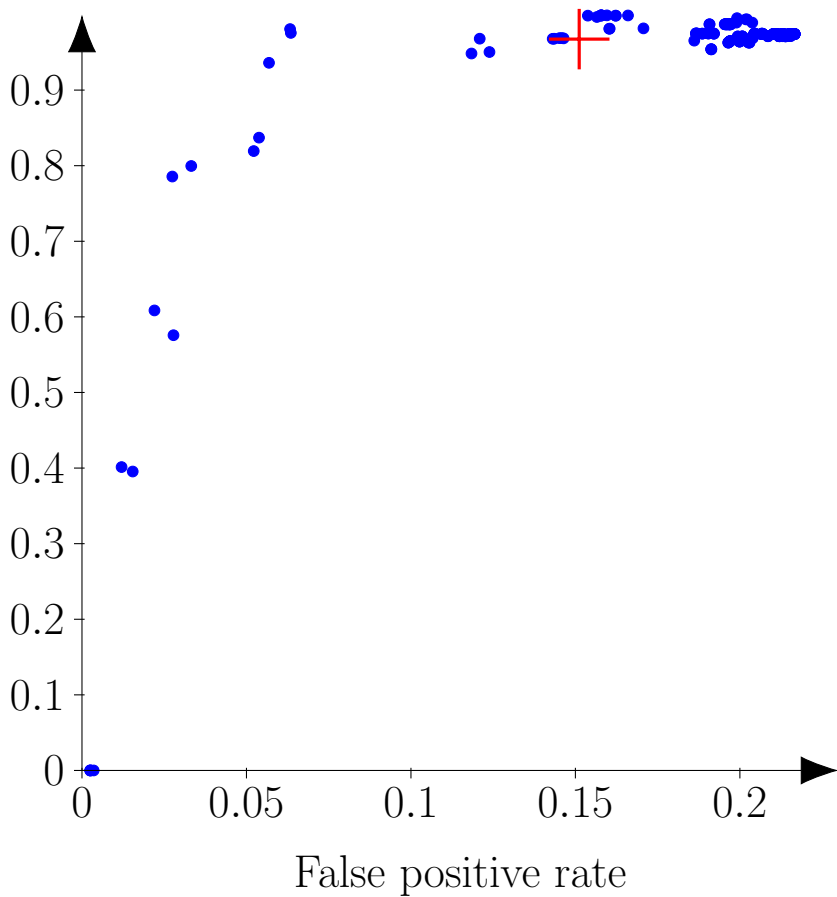

Supplement: s1 [file s1]

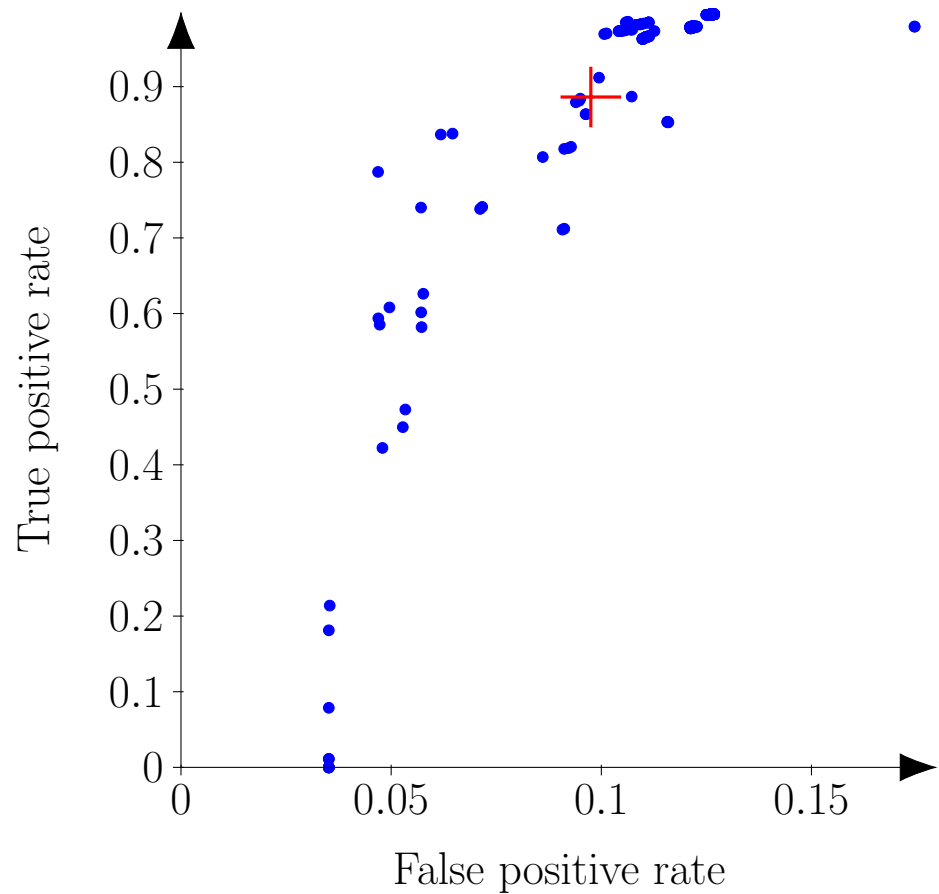

Supplement: s1 [file s1]

True positive rate

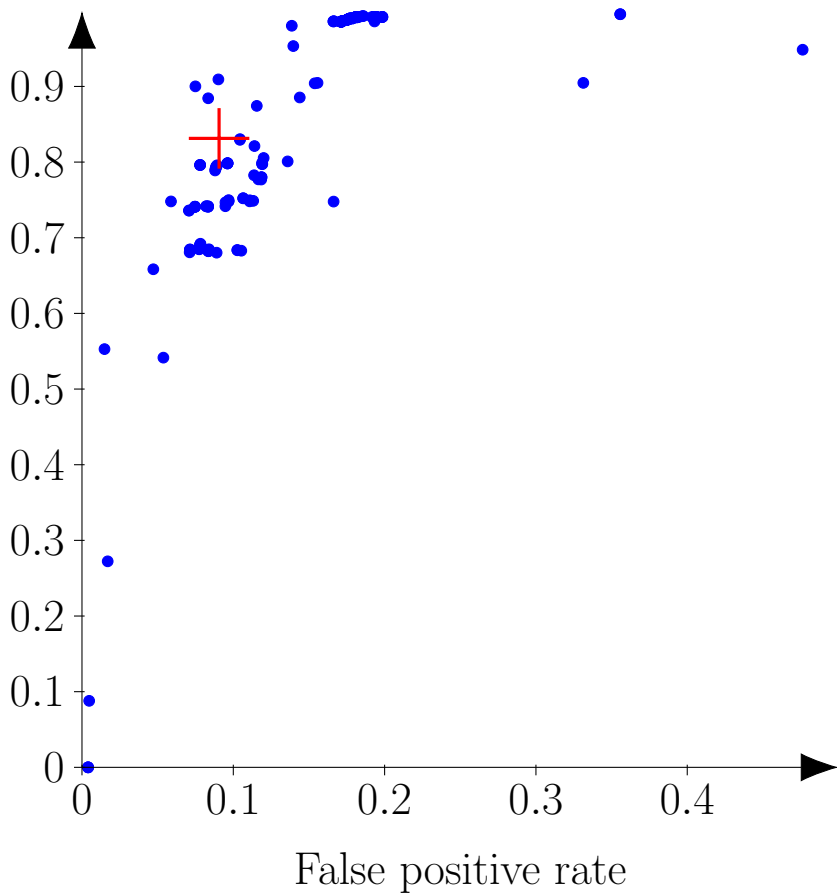

Supplement: s1 [file s1]

True positive rate

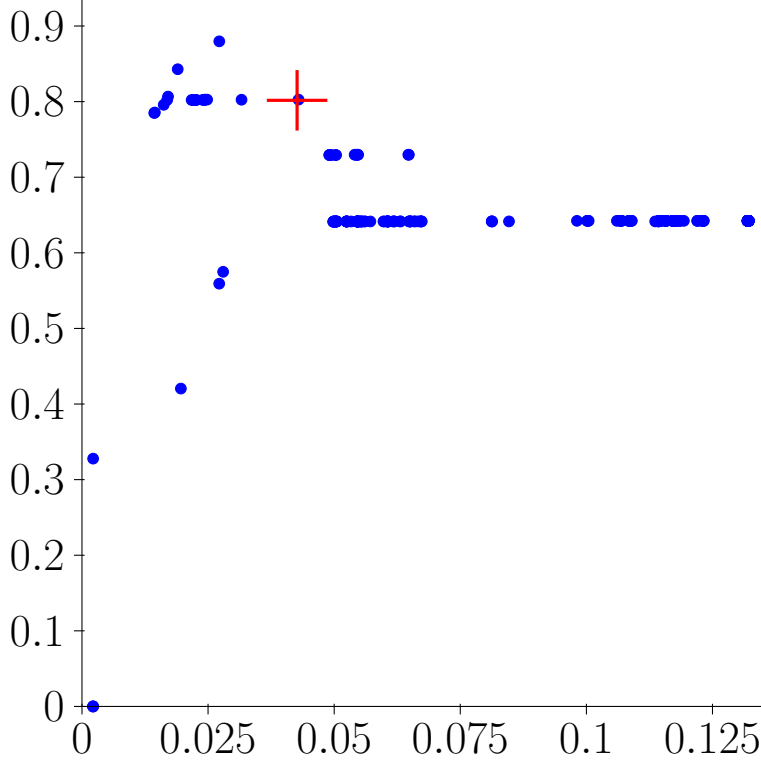

False positive rate

Supplement: s1 [file s1]

True positive rate

0.9  
0.8  
0.7  
0.6  
0.5  
0.4  
0.3  
0.2  
0.1  
0

0

0.05

0.1

0.15

0.2

0.25

False positive rate

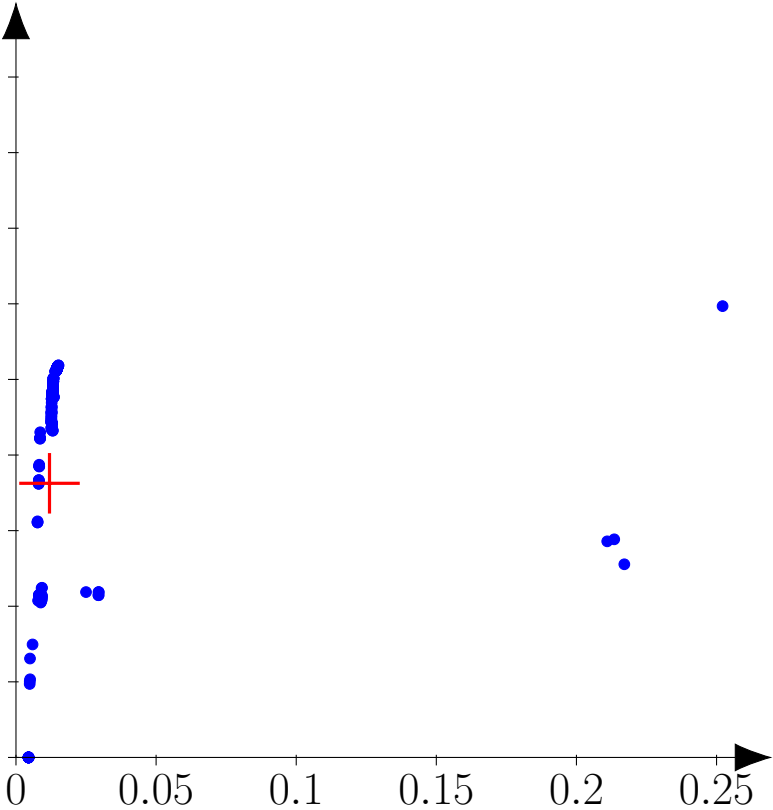

Supplement: s1 [file s1]

True positive rate

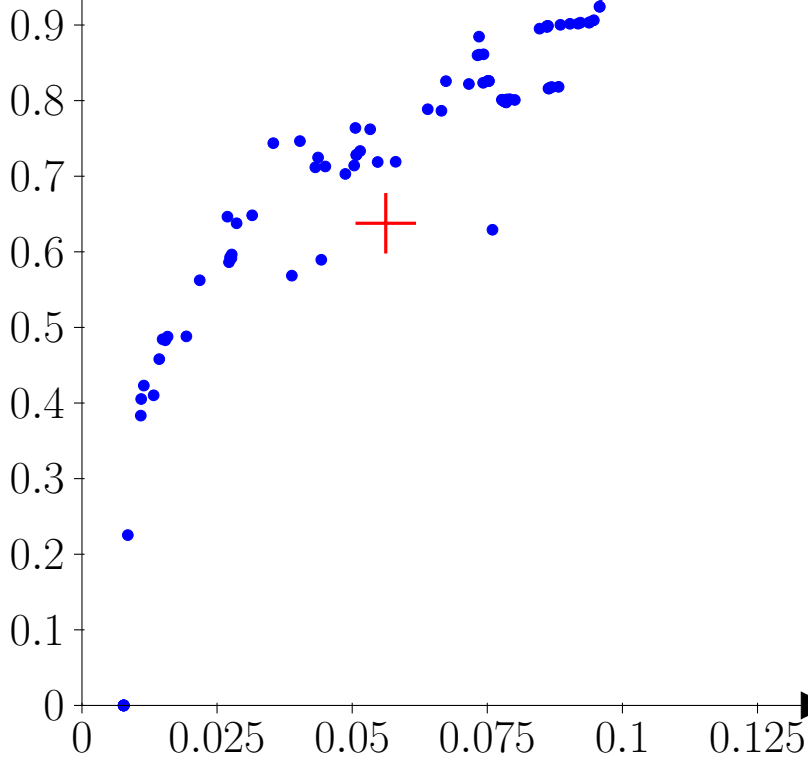

False positive rate

Supplement: s1 [file s1]

True positive rate

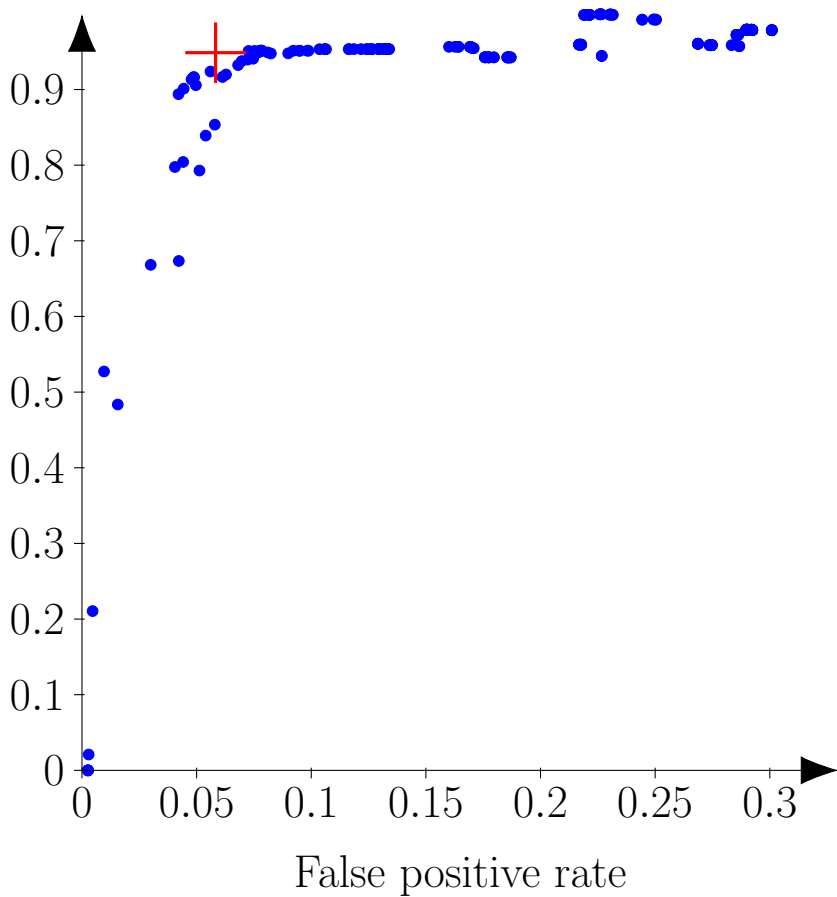

Supplement: s1 [file s1]

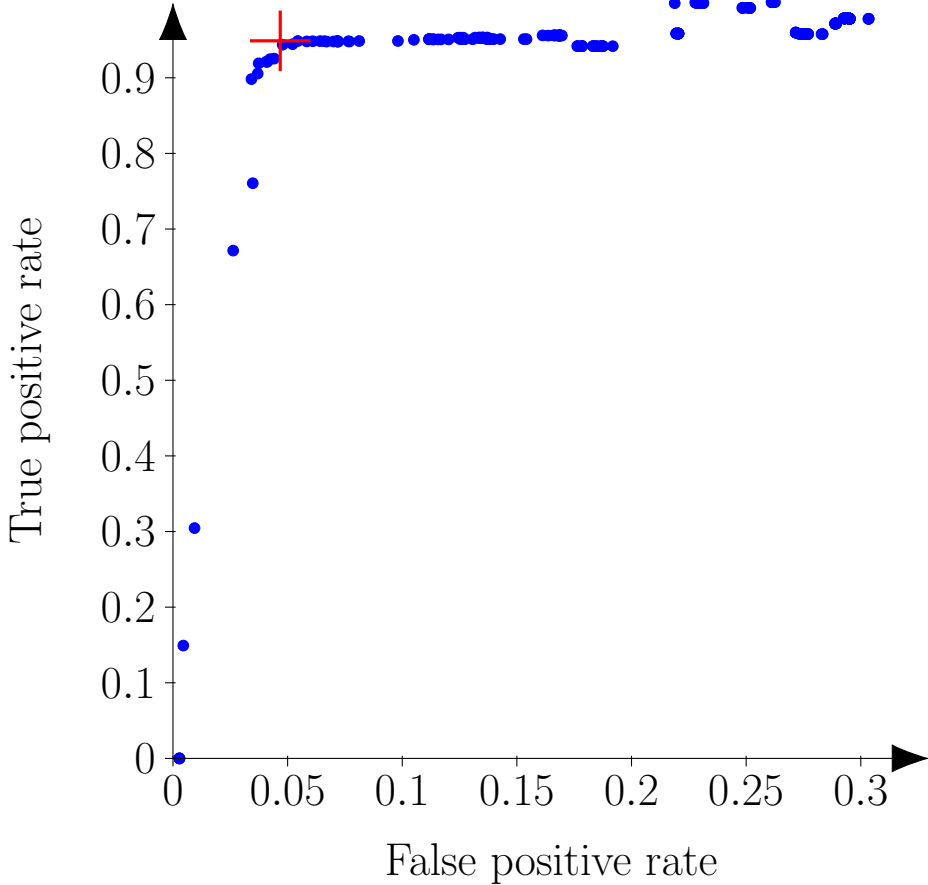

Supplement: s1 [file s1]

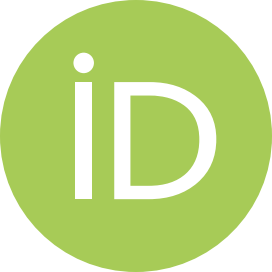

Supplement: s1 [file s1]

True positive rate

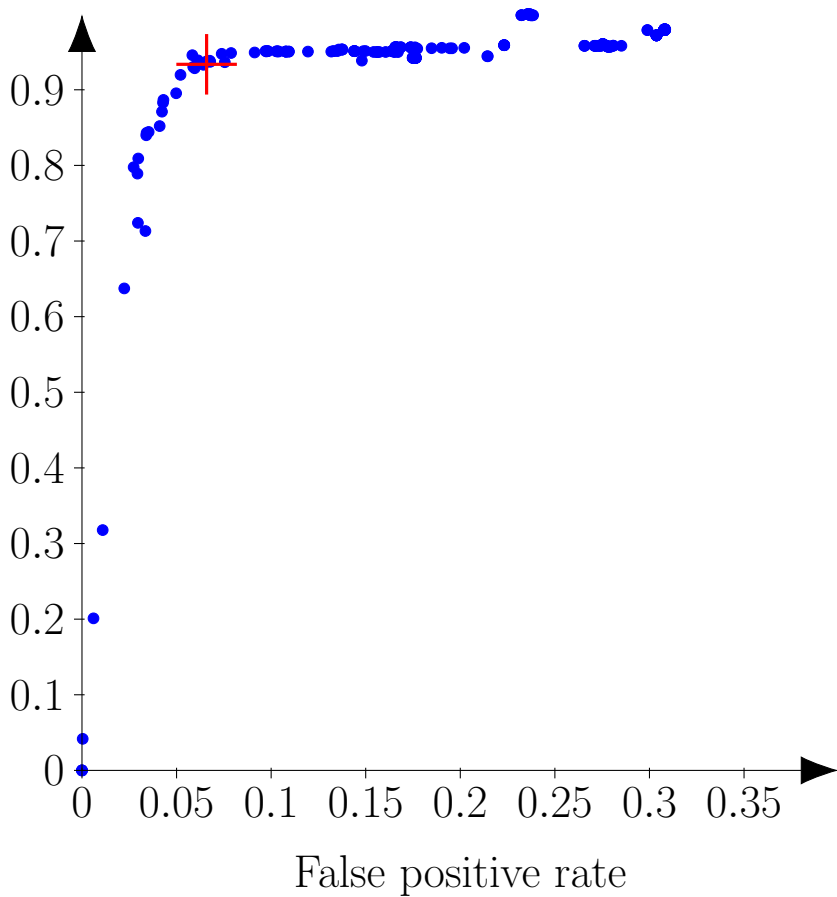

Supplement: s1 [file s1]

True positive rate

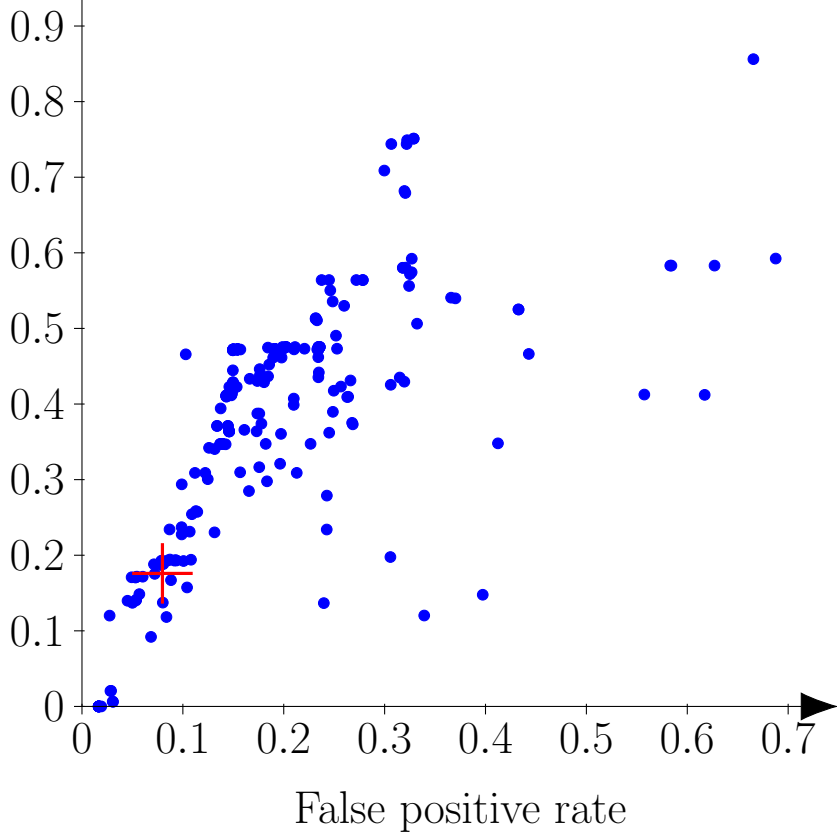

Supplement: s1 [file s1]

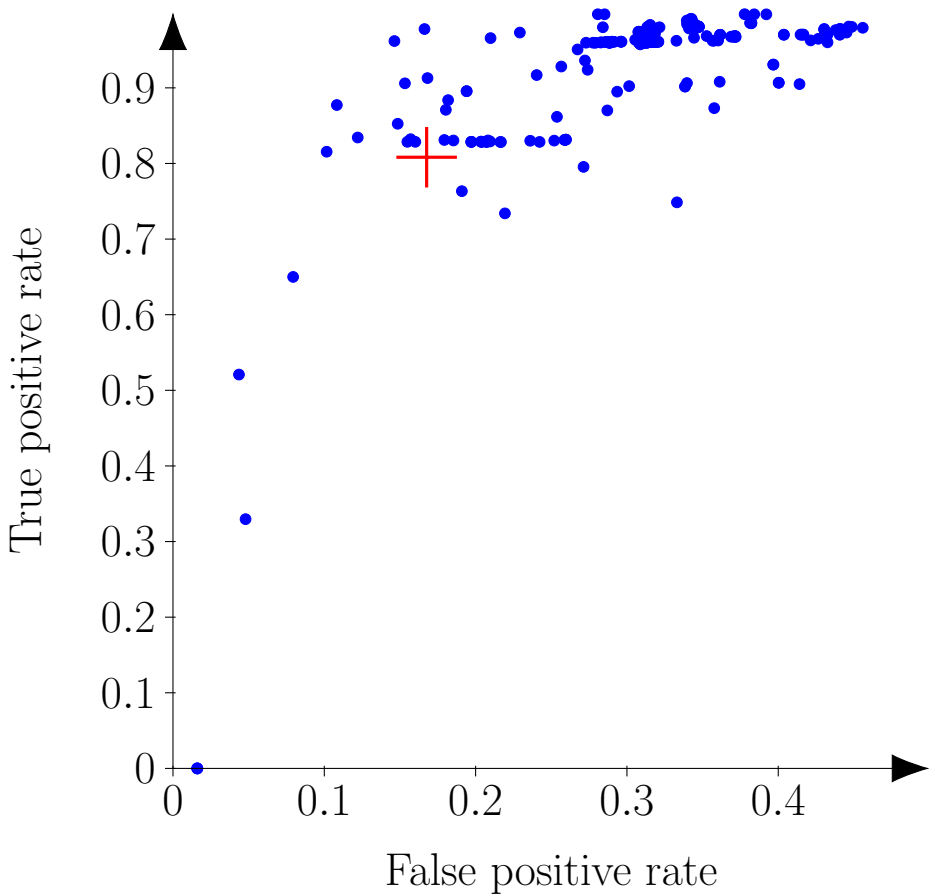

Supplement: s1 [file s1]

True positive rate

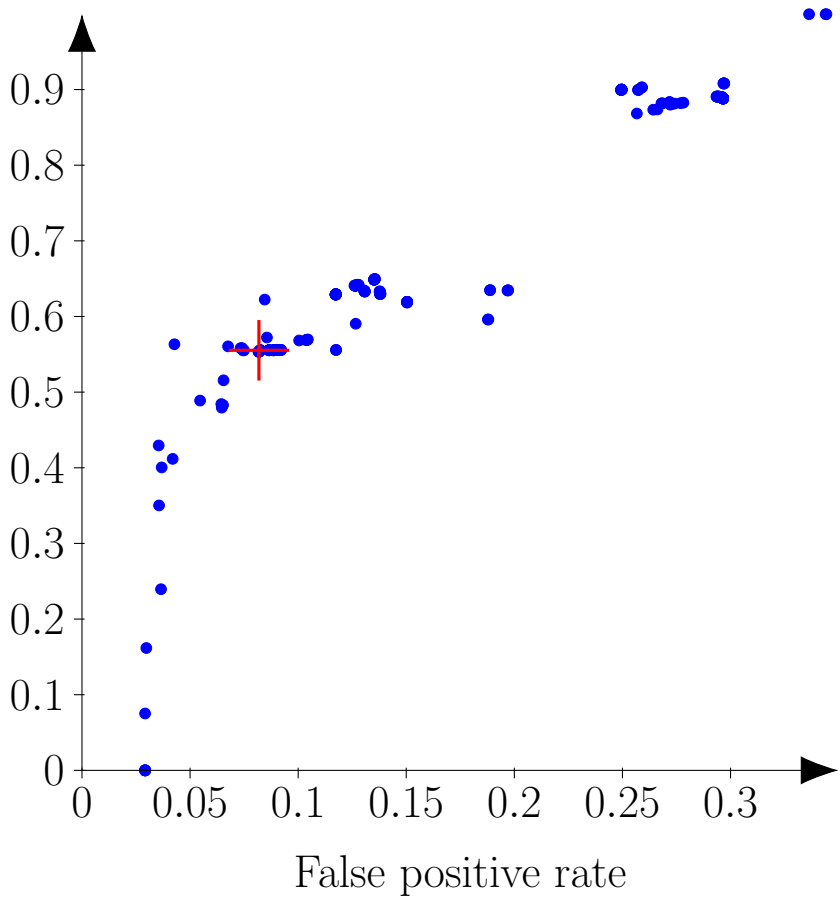

Supplement: s1 [file s1]

True positive rate

0.9  
0.8  
0.7  
0.6  
0.5  
0.4  
0.3  
0.2  
0.1  
0

0

0.1

0.2

0.3

0.4

False positive rate

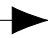

Supplement: s1 [file s1]

True positive rate

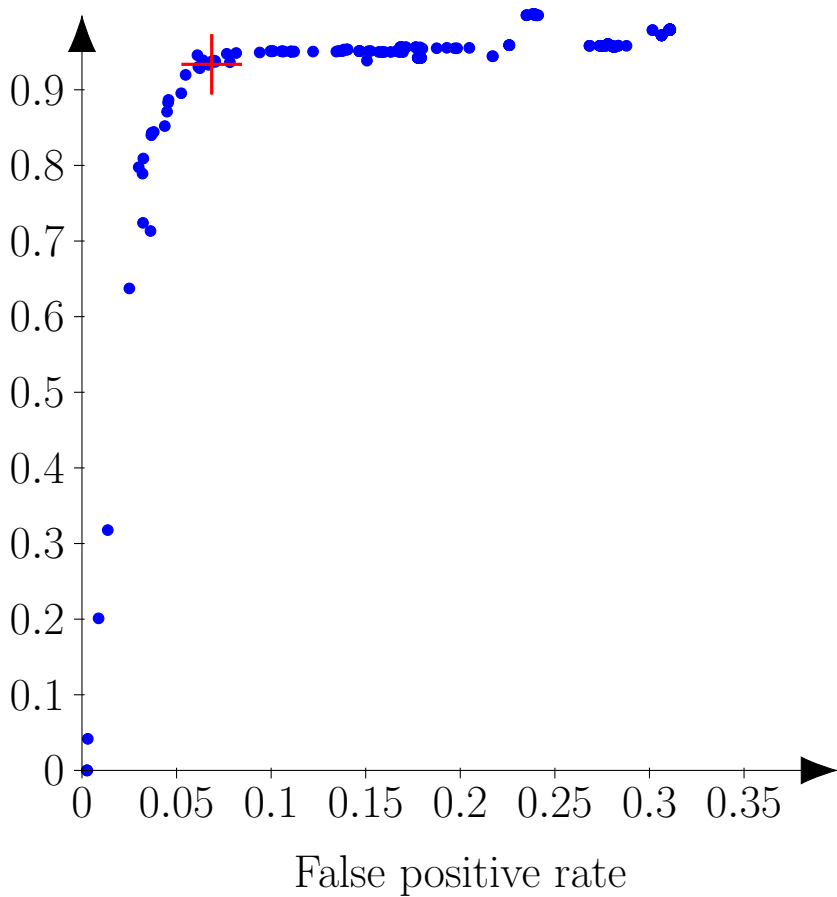

Supplement: s1 [file s1]

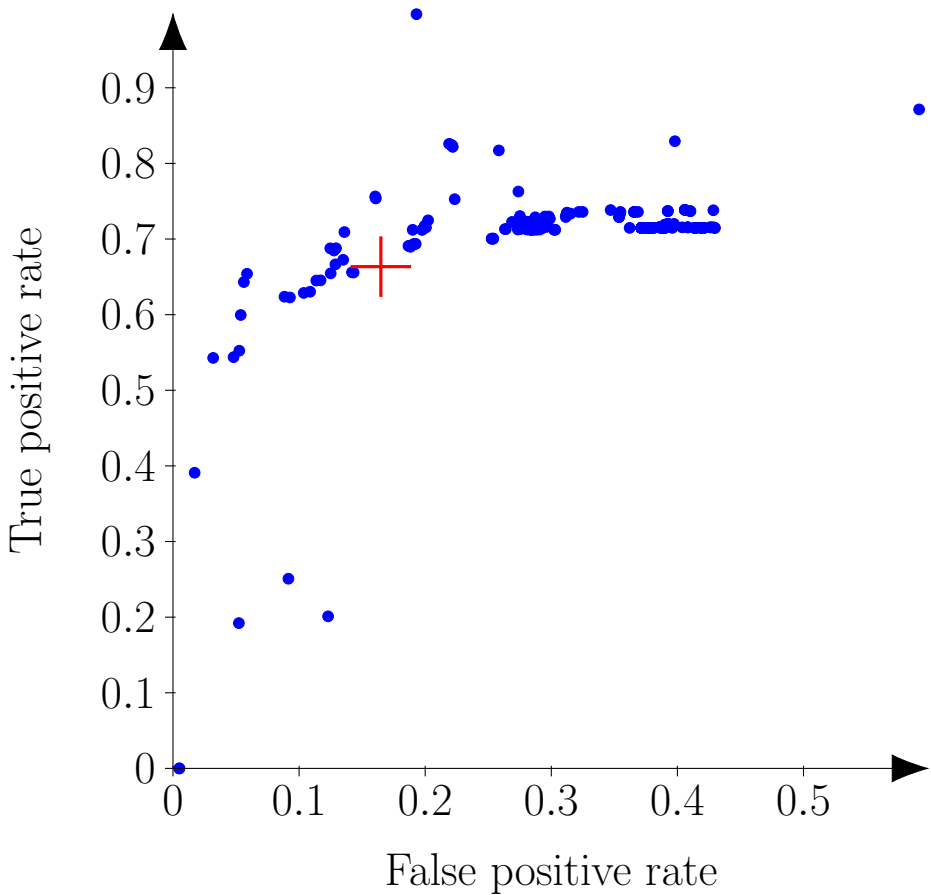

Supplement: s1 [file s1]

True positive rate

0.9  
0.8  
0.7  
0.6  
0.5  
0.4  
0.3  
0.2  
0.1  
0

0

0.05

0.1

0.15

0.2

0.25

0.3

0.35

0.4

False positive rate

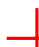

Supplement: s1 [file s1]

True positive rate

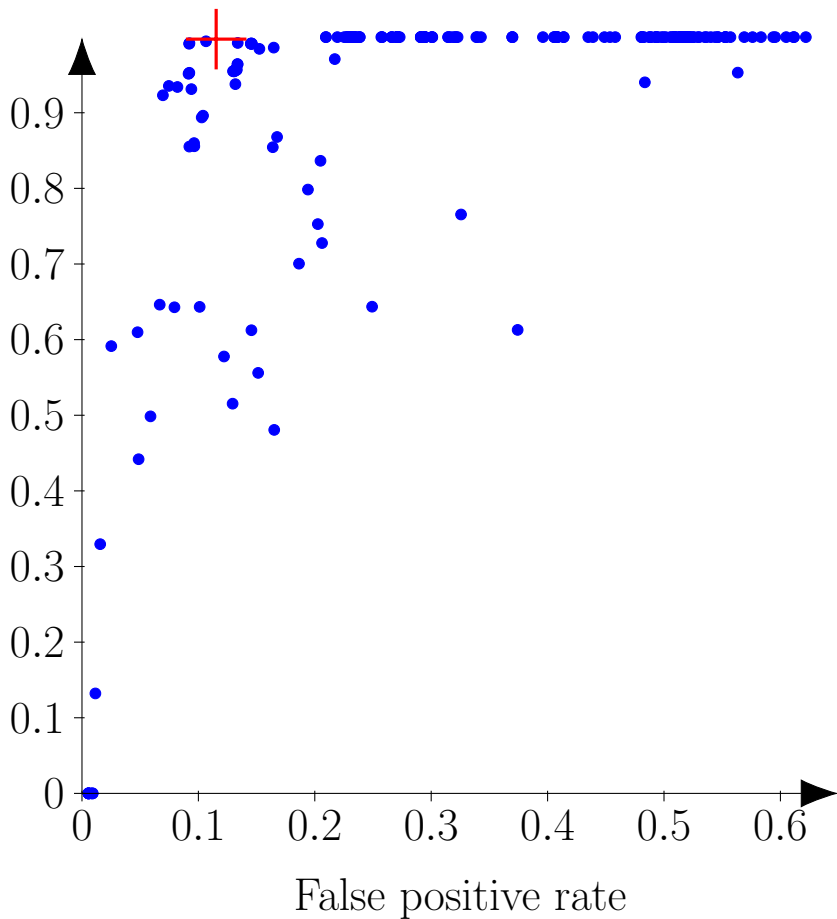

Supplement: s1 [file s1]

True positive rate

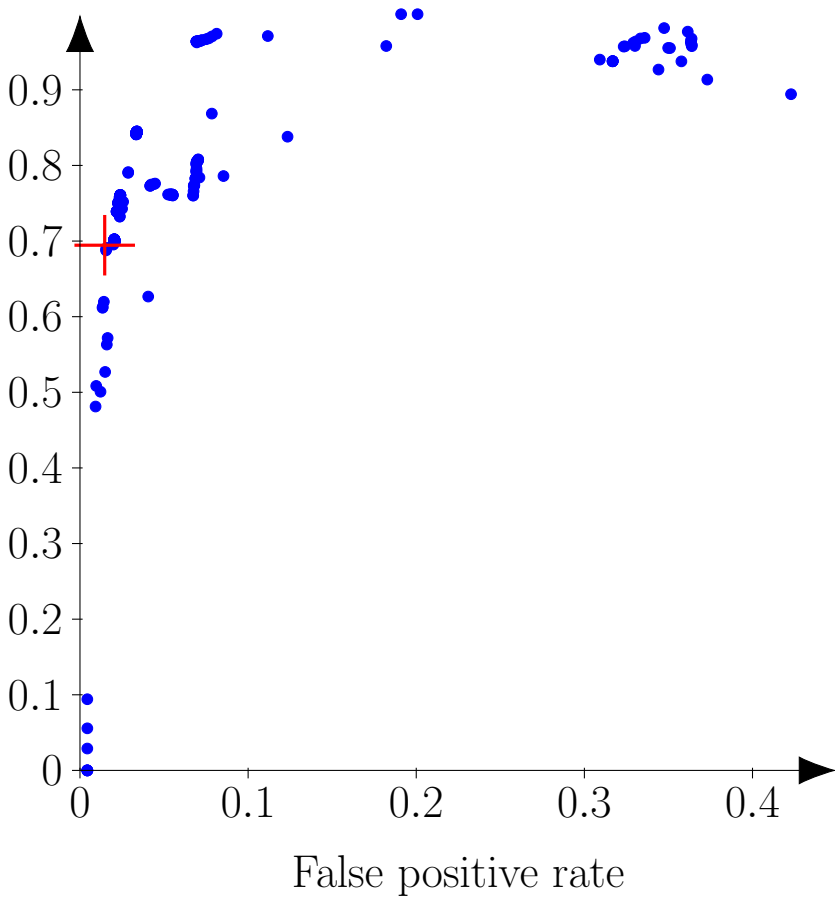

Supplement: s1 [file s1]

True positive rate

0.9  
0.8  
0.7  
0.6  
0.5  
0.4  
0.3  
0.2  
0.1  
0

0

0.01

0.02

0.03

0.04

False positive rate

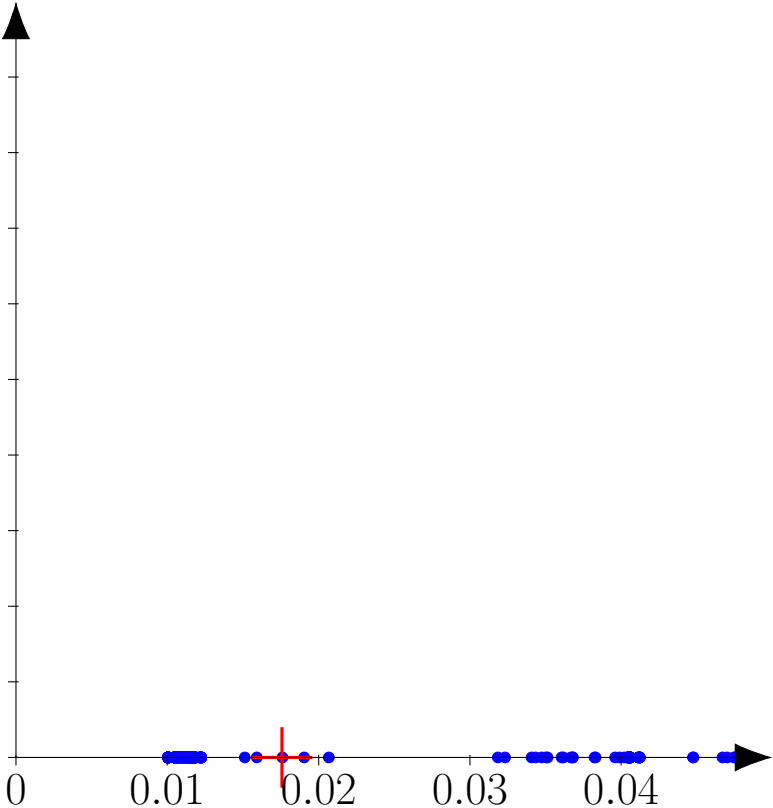

Supplement: s1 [file s1]

True positive rate

0.9  
0.8  
0.7  
0.6  
0.5  
0.4  
0.3  
0.2  
0.1  
0

0

0.025

0.05

0.075

0.1

False positive rate

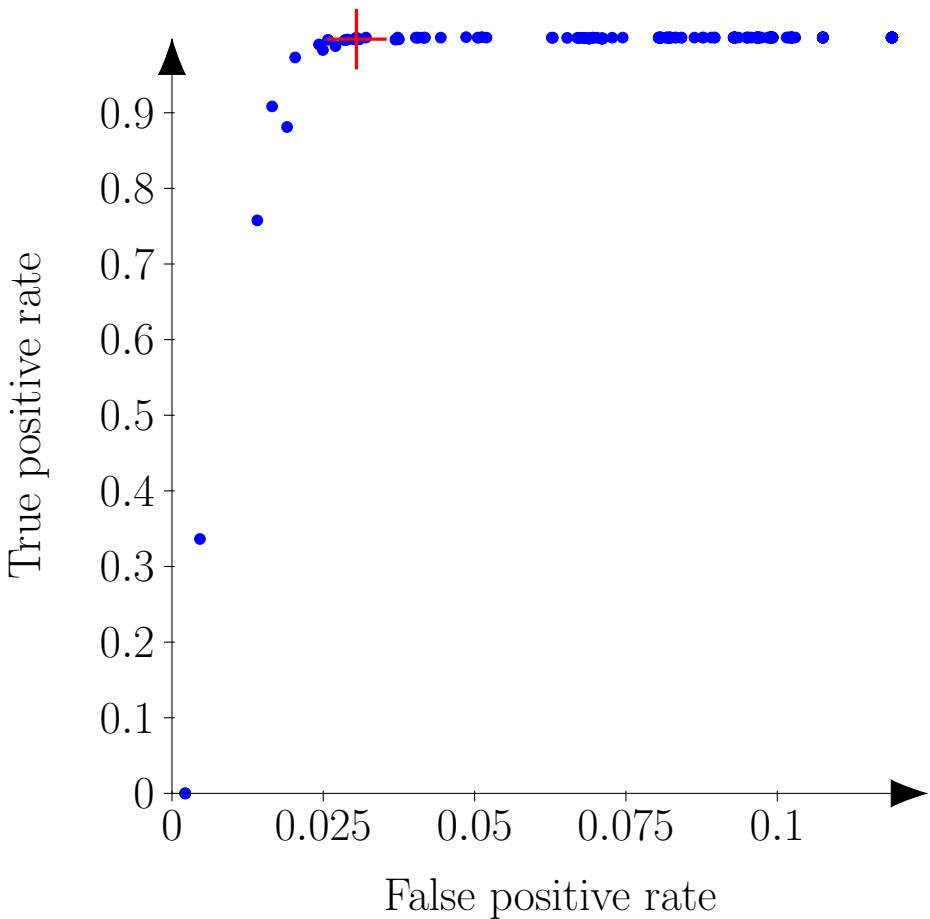

Supplement: s1 [file s1]

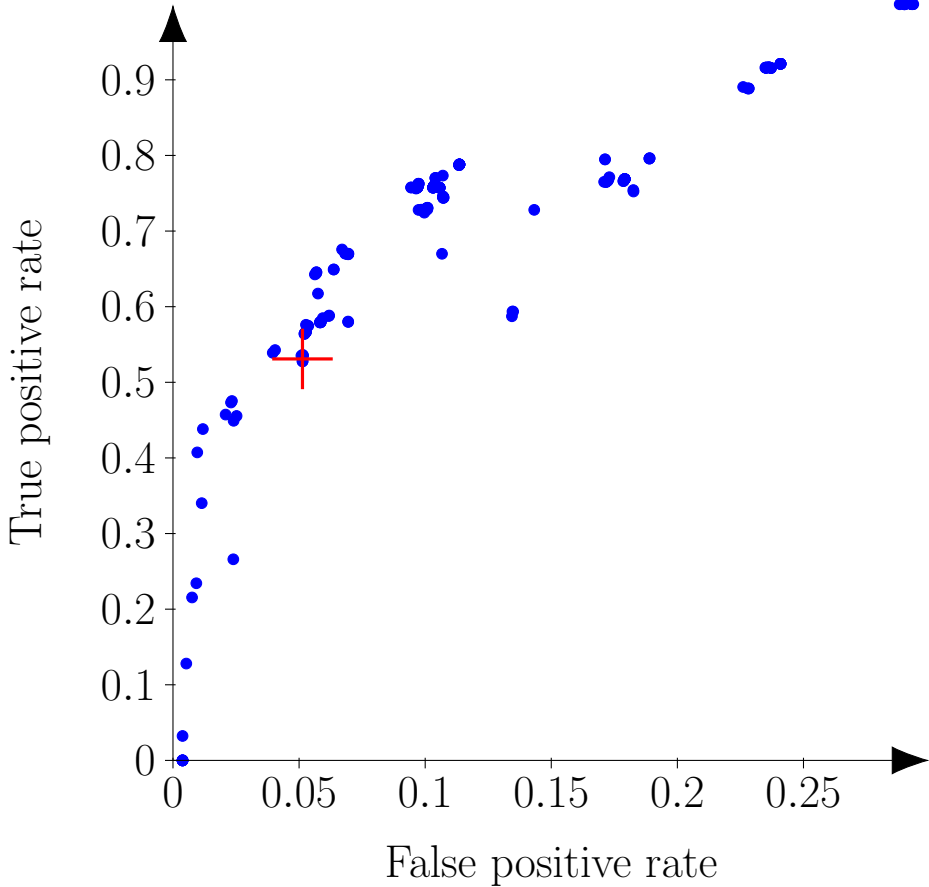

Supplement: s1 [file s1]

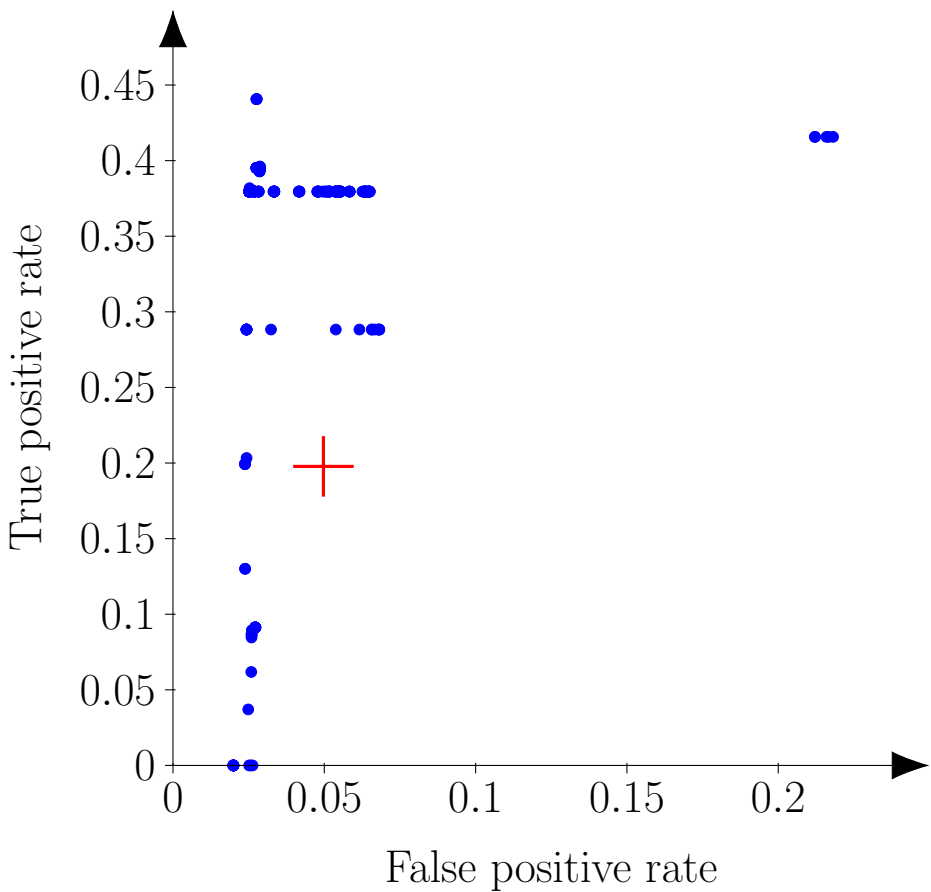

Supplement: s1 [file s1]

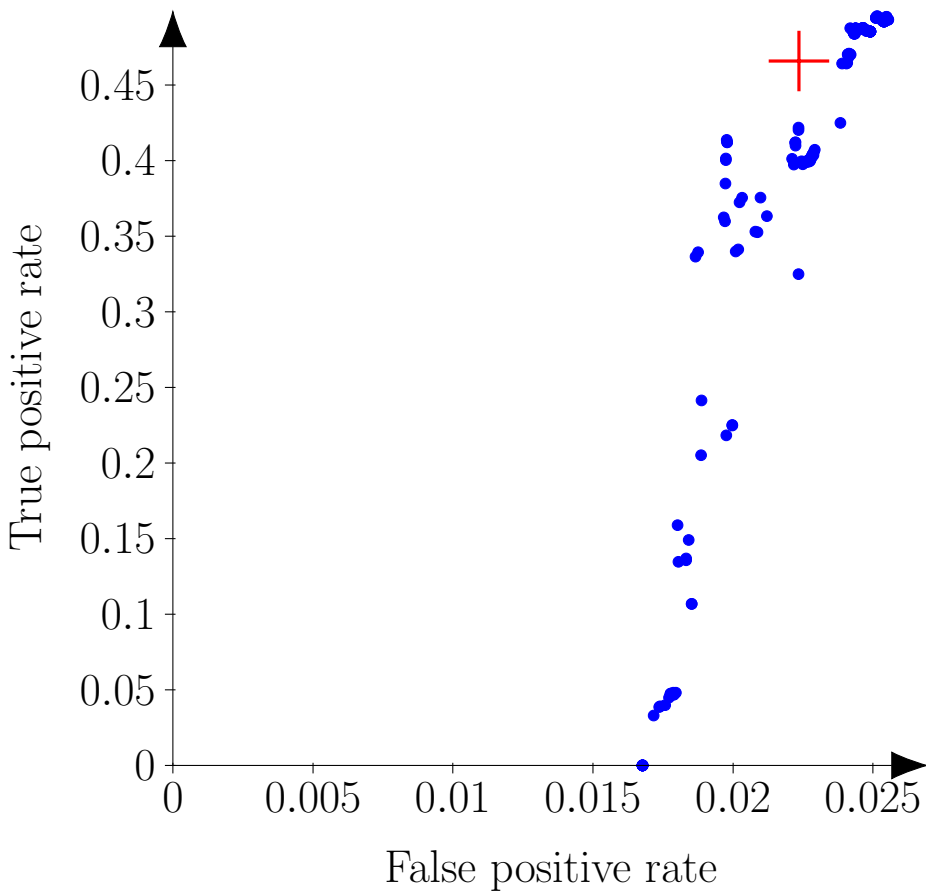

Supplement: s1 [file s1]
